# Supplementary material for: Risk factors associated with COVID-19 severity among patients on maintenance haemodialysis: a retrospective multicentre cross-sectional study in the UK
Source: HighWire-hosted journal article supplement (doi:10.1136/bmjopen-2021-054869), 2022-05-01
Supplement: bmjopen-2021-054869supp001_data_supplement.pdf [file bmjopen-2021-054869supp001_data_supplement.pdf]

## Project Registration Numbers for Participating Dialysis Networks

| Dialysis Network                                            | Project Registration Number |
|-------------------------------------------------------------|-----------------------------|
| University Hospitals of Leicester NHS Trust                 | 10802                       |
| Nottingham University Hospital NHS Trust                    | 21-050C                     |
| University Hospitals of Birmingham NHS Trust                | <a href="#">CARMS-16409</a> |
| University Hospitals of North Midlands NHS Trust            | CA41620                     |
| University Hospitals of Coventry and Warwickshire NHS Trust | <a href="#">10009</a>       |
